# Supplementary material for: Regulation of stem cell maintenance by the Polycomb protein FIE has been conserved during land plant evolution
Source: Oxford University Press journal article supplement (doi:10.1242/dev.035048), 2009-06-19
Supplement: dev035048-sup-035048-figs5.pdf [file dev035048-sup-035048-figs5.pdf]

|           |       |                     |                        |                  |
|-----------|-------|---------------------|------------------------|------------------|
|           |       | (***)               |                        | (**)             |
| AtCLF     | (151) | NCSFLFNLNDQ---FVLDA | AYRKGDKLKFANHSPE       | PNCYAKVIMVAGDHRV |
| PpCLF     | (147) | NSSFLLFNLNDQASLYVLD | ACRKGDKLKFANHSPT       | PNCYAKVIMVSGDHRV |
| DmEz      | (57)  | MCSFLFNLNND---FVVD  | ATRKGDKIRFANHSIN       | PNCYAKVMMVTGDHRI |
| HsEZH2    | (57)  | MCSFLFNLNND---FVVD  | ATRKGDKIRFANHSVN       | PNCYAKVMMVNGDHRV |
| vSET      | (47)  | LEDYLF              | SRKNMS-----AM-ALGFGAIF | NHSKDP--NARHELTA |
| Consensus | (151) | MCSFLFNLNN          | FVLDA RKG KIKFANHS     | PNCYAKVIMVAGDHRI |

(\*)

|           |       |          |                |            |                           |
|-----------|-------|----------|----------------|------------|---------------------------|
| AtCLF     | (198) | GIFAKERI | ILAGEELFYDYRYE | PDRA       | PAWAKKPEAPGSKKDENVTPSVGRP |
| PpCLF     | (197) | GIFAKERI | IGAGEELFYDYQYE | PDRA       | PVWARKPDDPNNK-RDDMPSTGGRA |
| DmEz      | (104) | GIFAKRAI | IQPGEELFFDYRYG | PTEQLKFVGI | EREMEIV-----              |
| HsEZH2    | (104) | GIFAKRAI | IQTGEELFFDYRYS | QADALKYVGI | EREMEIP-----              |
| vSET      | (88)  | RIFTIKPI | IAIGEEITISYG   | DDYWLSRP   | RLTQN-----                |
| Consensus | (201) | GIFAKR I | GEELFFDYRYEP   | A W V      | E                         |
