# Supplementary figures and images for: Regulation of stem cell maintenance by the Polycomb protein FIE has been conserved during land plant evolution
Source: Oxford University Press journal article supplement (doi:10.1242/dev.035048), 2009-06-19

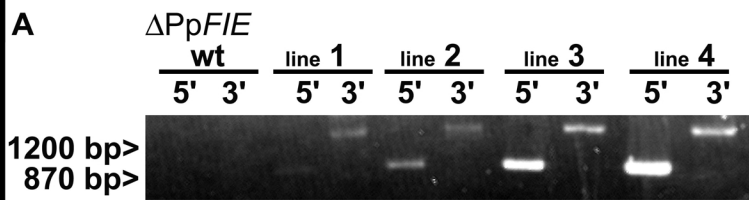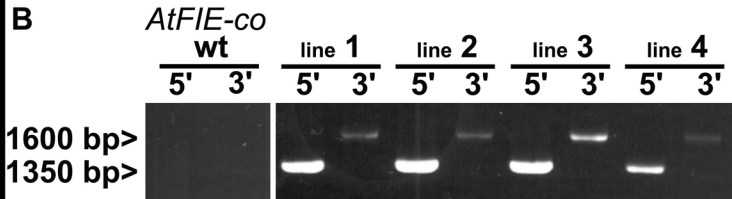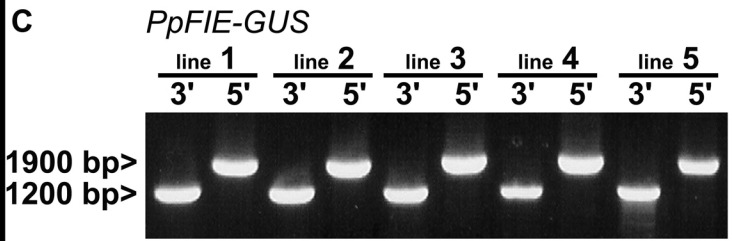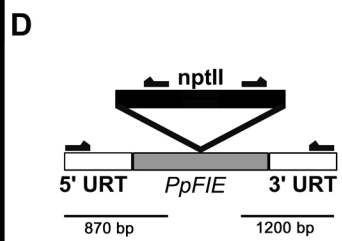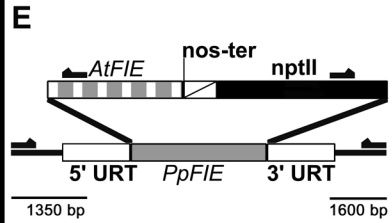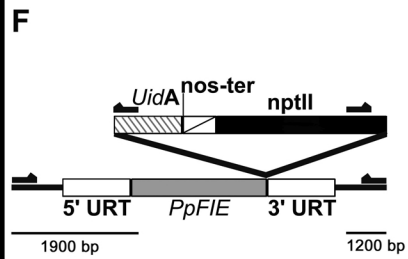

Supplement: dev035048-sup-035048-figs1.pdf [file dev035048-sup-035048-figs1.pdf]

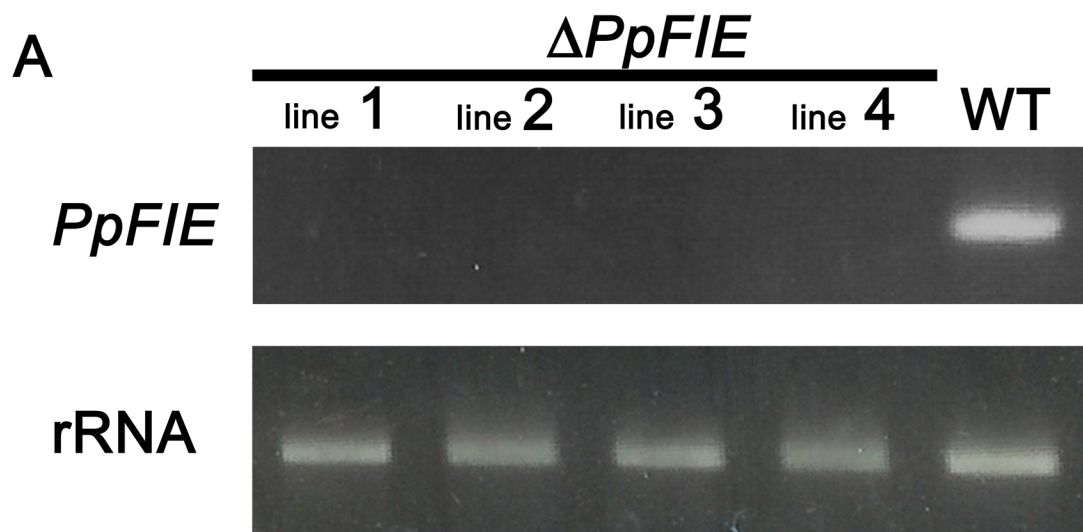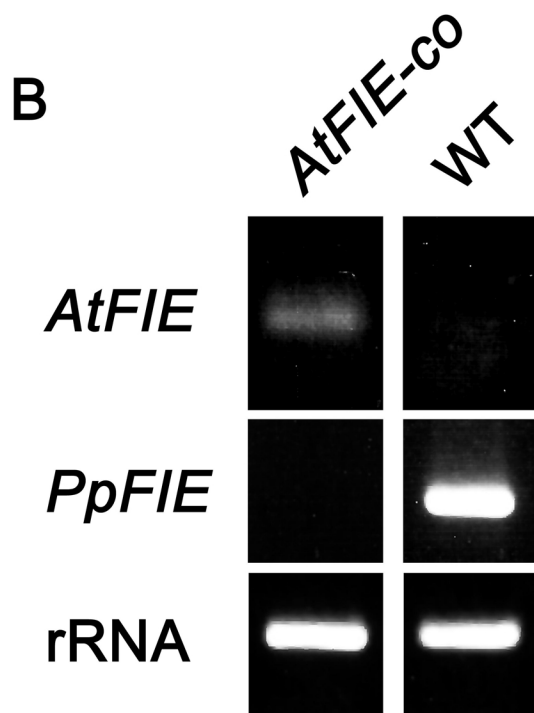

Supplement: dev035048-sup-035048-figs2.pdf [file dev035048-sup-035048-figs2.pdf]

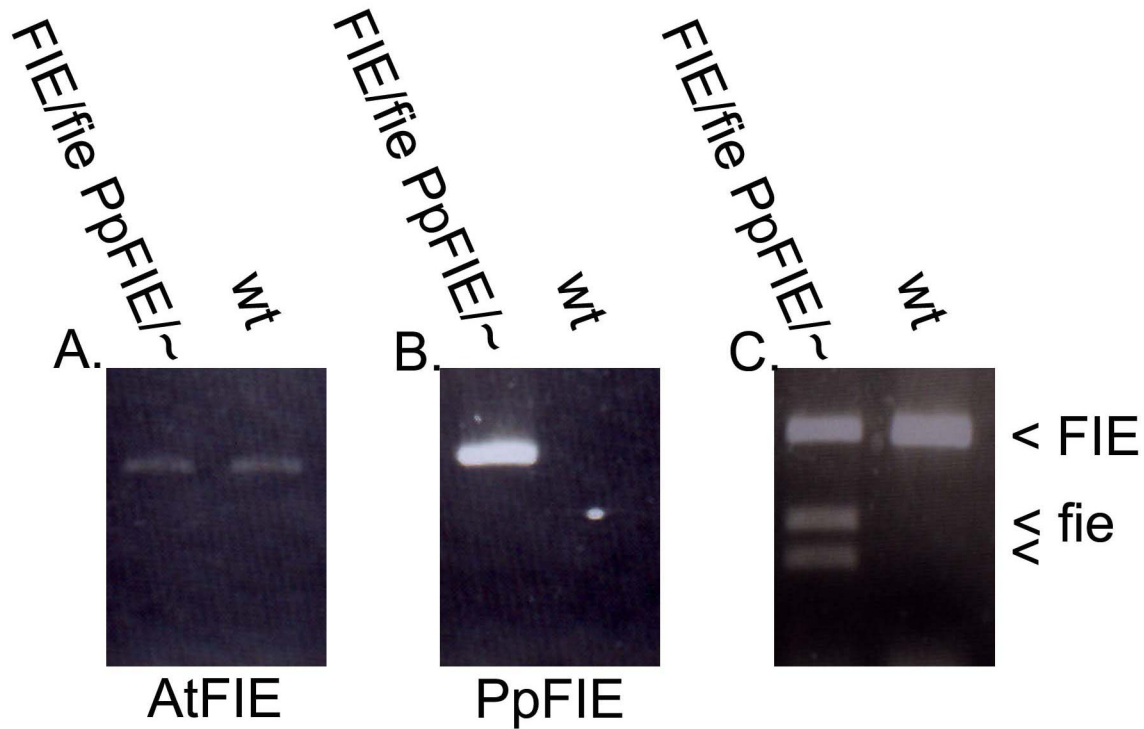

Supplement: dev035048-sup-035048-figs3.pdf [file dev035048-sup-035048-figs3.pdf]

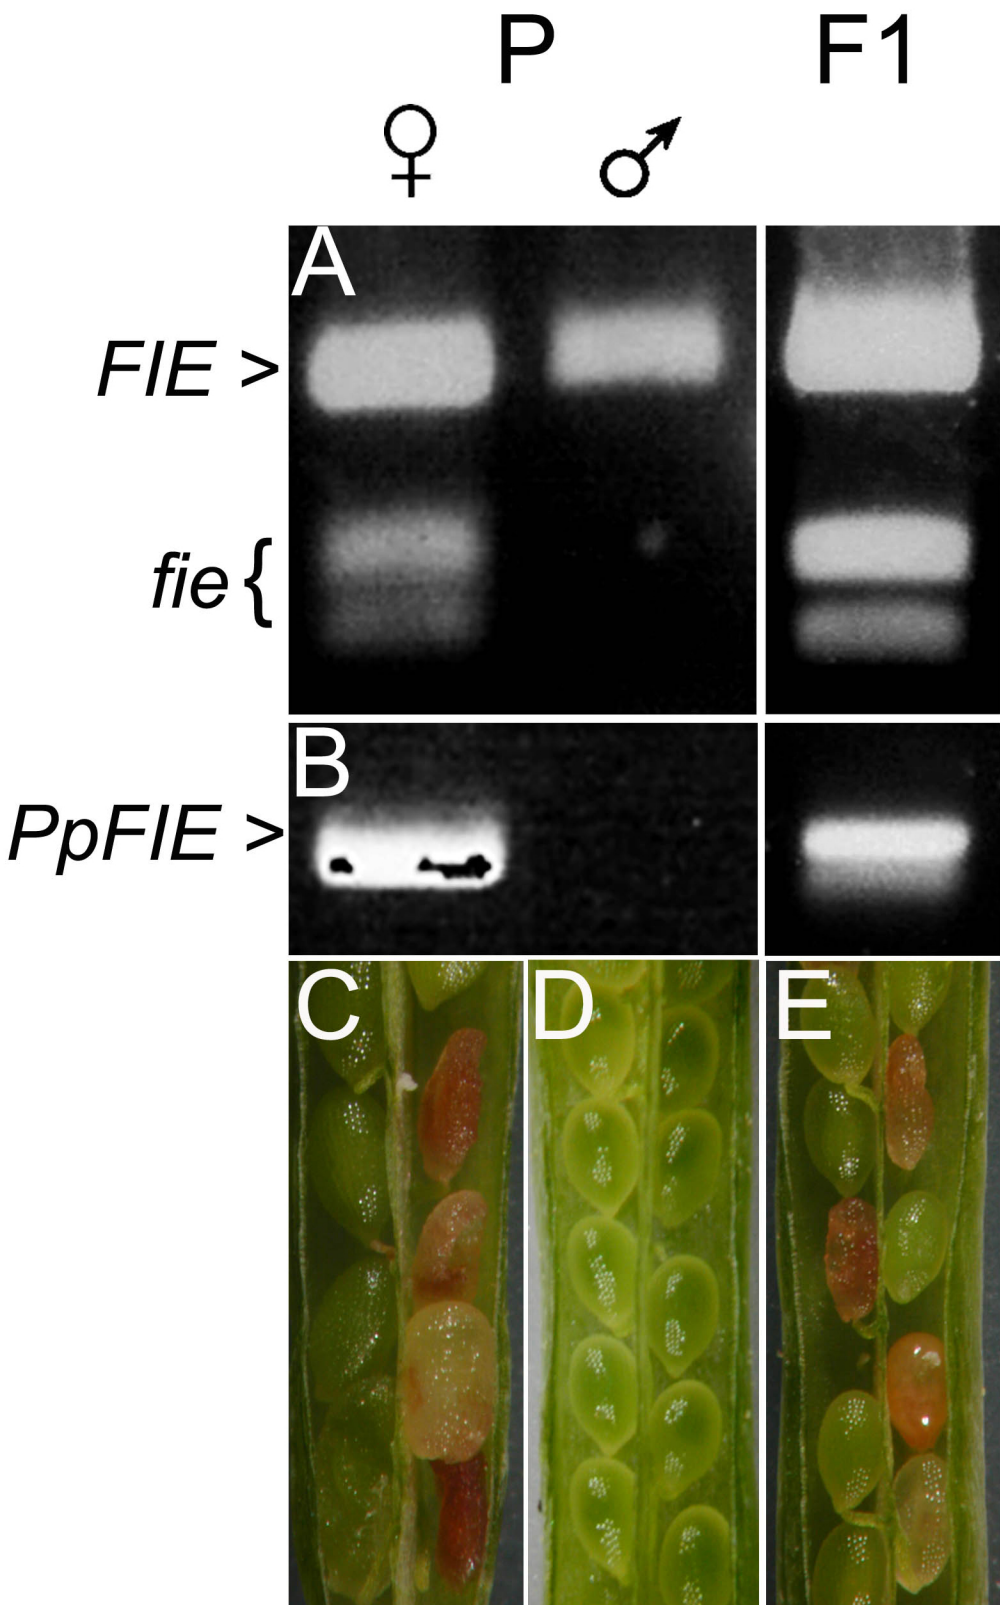

Supplement: dev035048-sup-035048-figs4.pdf [file dev035048-sup-035048-figs4.pdf]

$\lambda$  BstE II

$\Delta PpFIE$

line 1

line 2

line 3

8456>  
7242>

3675>

2323>

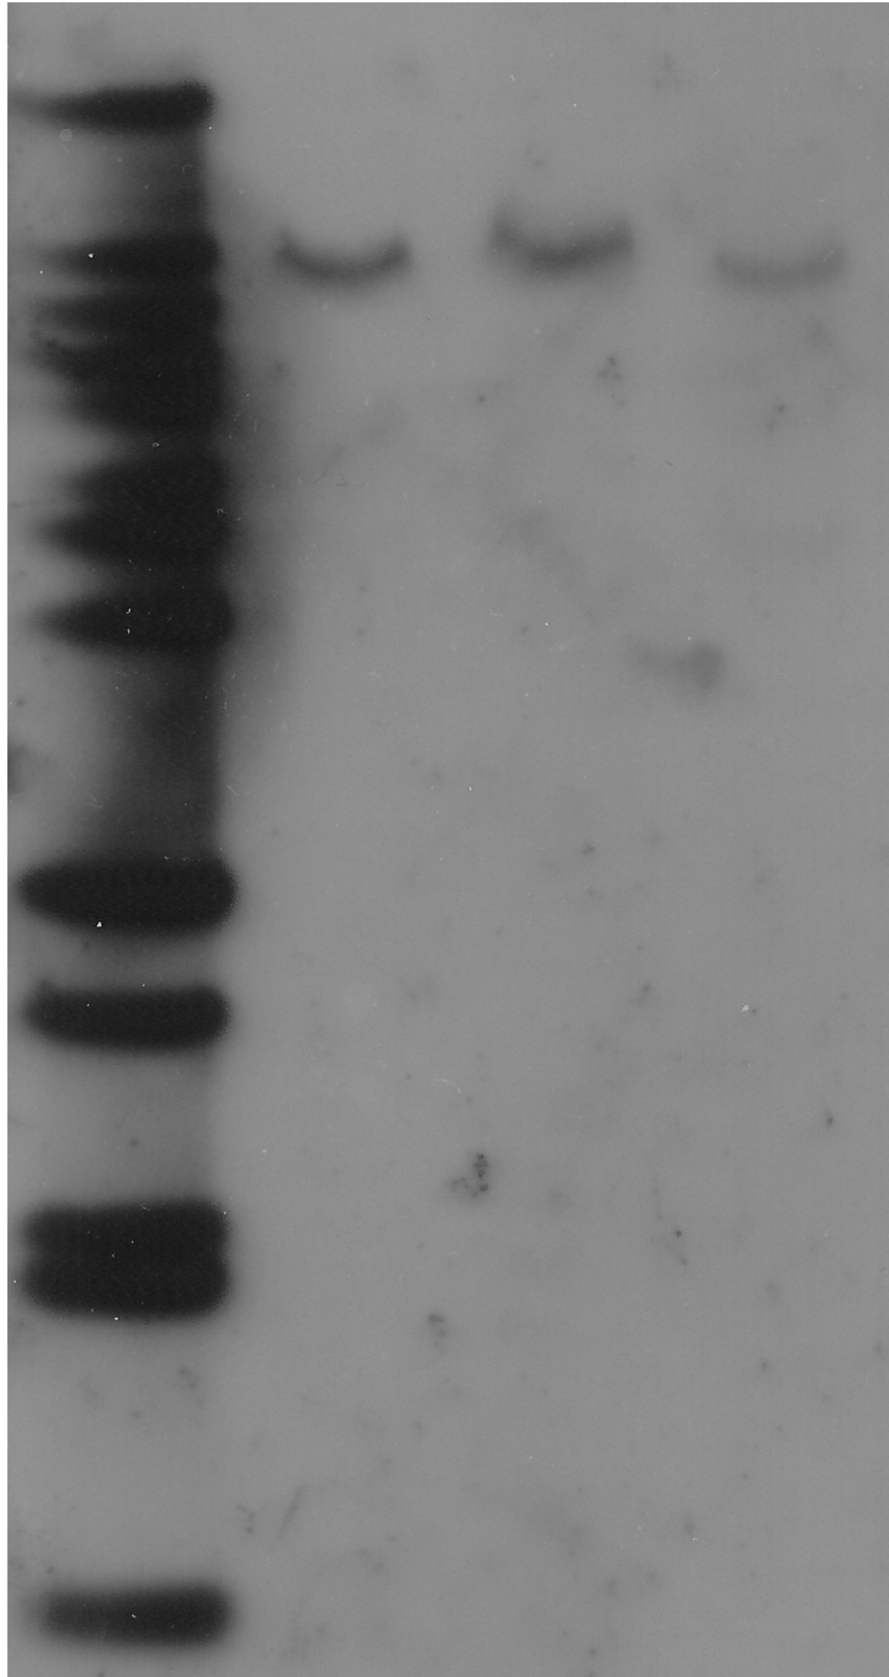

nptII

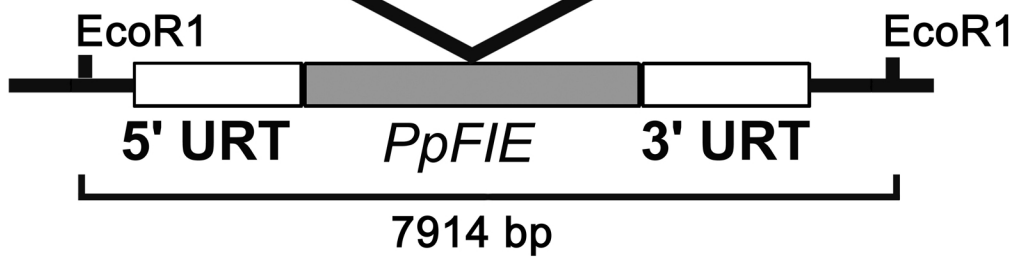

Supplement: dev035048-sup-035048-figs6.pdf [file dev035048-sup-035048-figs6.pdf]
